# Supplementary material for: Troponin T but not C reactive protein is associated with future surgery for aortic stenosis: a population-based nested case-referent study
Source: HighWire-hosted journal article supplement (doi:10.1136/openhrt-2020-001325), 2020-10-01
Supplement: openhrt-2020-001325supp001_data_supplement.pdf [file openhrt-2020-001325supp001_data_supplement.pdf]

**Troponin T but not C–reactive protein is associated with future surgery for aortic stenosis - a population based nested case-referent study**

**Supplementary Table 1**

Anders Holmgren<sup>1</sup>, Johan Ljungberg<sup>2</sup>, Johan Hultdin<sup>3</sup>, Bengt Johansson<sup>2</sup>, Ingvar A. Bergdahl<sup>4</sup>, Ulf Näslund<sup>2</sup>, and Stefan Söderberg<sup>2</sup>.

**Academic affiliation**

<sup>1</sup>Department of Public Health and Clinical Medicine, Cardiac Surgery, Umeå University, Sweden

<sup>2</sup>Department of Public Health and Clinical Medicine, Medicine, Umeå University, Sweden

<sup>3</sup>Department of Medical Biosciences, Clinical Chemistry, Umeå University, Sweden

<sup>4</sup>Department of Biobank Research, Umeå University, Sweden

**Corresponding author:** Stefan Söderberg, Department of Public Health and Clinical Medicine, Umeå University, SE-901 87 Umeå, Sweden. Phone +46 90 785 18 46. E-mail [stefan.soderberg@umu.se](mailto:stefan.soderberg@umu.se)

**Supplementary table 1. Preoperative characteristics**

|                                             | Available no | No CAD           | CAD              | <i>P</i> |
|---------------------------------------------|--------------|------------------|------------------|----------|
| N (%)                                       |              | 132 (39.4)       | 203 (60.6)       |          |
| <b><i>History</i></b>                       |              |                  |                  |          |
| Female sex (%)                              | 132/203      | 59.1 (50.6–67.6) | 40.9 (34.1–47.7) | 0.001    |
| Age at survey (years)                       | 132/203      | 54.2 (52.5–55.8) | 58.4 (57.3–59.4) | <0.001   |
| Age at surgery (years)                      | 132/203      | 63.8 (62.0–65.5) | 69.6 (68.6–70.6) | <0.001   |
| Known heart failure (%)                     | 116/185      | 6.0 (1.6–10.4)   | 6.5 (2.9–10.1)   | 0.88     |
| Known renal failure (%)                     | 131/202      | 4.6 (1.0–8.2)    | 7.4 (3.8–11.1)   | 0.28     |
| Previous MI (%)                             | 126/198      | 1.6 (0–3.8)      | 13.1 (8.4–17.9)  | <0.001   |
| Previous CABG (%)                           | 131/202      | 0.0              | 6.4 (3.0–9.8)    | <0.001   |
| <b><i>Clinical parameters</i></b>           |              |                  |                  |          |
| Systolic BP (mmHg)                          | 128/195      | 139 (136–143)    | 144 (141–147)    | 0.05     |
| Diastolic BP (mmHg)                         | 127/195      | 81 (79–83)       | 82 (80–83)       | 0.61     |
| Heart rate (bpm)                            | 126/200      | 71 (69–74)       | 72 (70–74)       | 0.83     |
| <b><i>Preoperative echocardiography</i></b> |              |                  |                  |          |
| Root of aorta (mm)                          | 128/191      | 34.1 (33.2–35.0) | 34.0 (33.3–34.7) | 0.83     |

|                                     |         |                     |                  |        |
|-------------------------------------|---------|---------------------|------------------|--------|
| Left atrium (mm)                    | 126/189 | 40.7 (39.4–42.0)    | 42.1 (41.1–43.2) | 0.10   |
| LVEDD (mm)                          | 130/195 | 50.2 (48.9–51.5)    | 49.5 (48.7–50.4) | 0.38   |
| LVESD (mm)                          | 102/147 | 31.7 (30.2–33.2)    | 31.5 (30.2–32.8) | 0.88   |
| Intraventricular septum (mm)        | 117/170 | 13.0 (12.6–13.5)    | 13.2 (12.7–13.8) | 0.59   |
| Posterior wall (mm)                 | 107/153 | 11.4 (11.0–11.8)    | 11.0 (10.7–11.3) | 0.12   |
| LV mass (g)                         | 105/153 | 247 (230–264)       | 232 (221–243)    | 0.13   |
| EF according to Teichholz (%)       | 103/147 | 66 (64–69)          | 65 (63–68)       | 0.62   |
| LV function (reduced vs normal)     | 129/193 | 11.6 (6.0–17.2)     | 19.7 (14.0–25.3) | 0.05   |
| Aorta gradient max (mmHg)           | 132/196 | 78.9 (74.5–83.4)    | 68.0 (64.3–71.6) | <0.001 |
| Aorta gradient mean (mmHg)          | 128/194 | 49.1 (46.0–52.1)    | 41.8 (39.3–44.2) | <0.001 |
| VTI LVOT (cm)                       | 110/162 | 22.2 (21.3–23.2)    | 21.7 (20.8–22.7) | 0.50   |
| VTI Aorta (cm)                      | 107/159 | 105.4 (101.1–109.7) | 94.0 (90.4–97.6) | <0.001 |
| Aorta valve area (cm <sup>2</sup> ) | 127/200 | 0.78 (0.74–0.81)    | 0.85 (0.81–0.89) | 0.01   |

Data shown are findings from the preoperative assessment, stratified the presence of CAD according to the preoperative coronary angiogram. Available numbers and means with 95% confidence intervals are presented.

All cases except one had a preoperative angiogram. CAD indicates coronary artery disease, MI myocardial infarction, CABG coronary by-pass grafting, BP blood pressure, LVEDD left ventricular end-diastolic diameter, LVESD left ventricular end-systolic diameter, LV left ventricle, VTI velocity time integral, LVOT left ventricle outflow tractus, and EF ejection fraction.
